# Supplementary material
Source: PubMed Central journal article supplement (PMC9080989)
Supplement: plantbiotechnology-39-1-21.1224b-s001.pdf [file plantbiotechnology-39-1-21.1224b-s001.pdf]

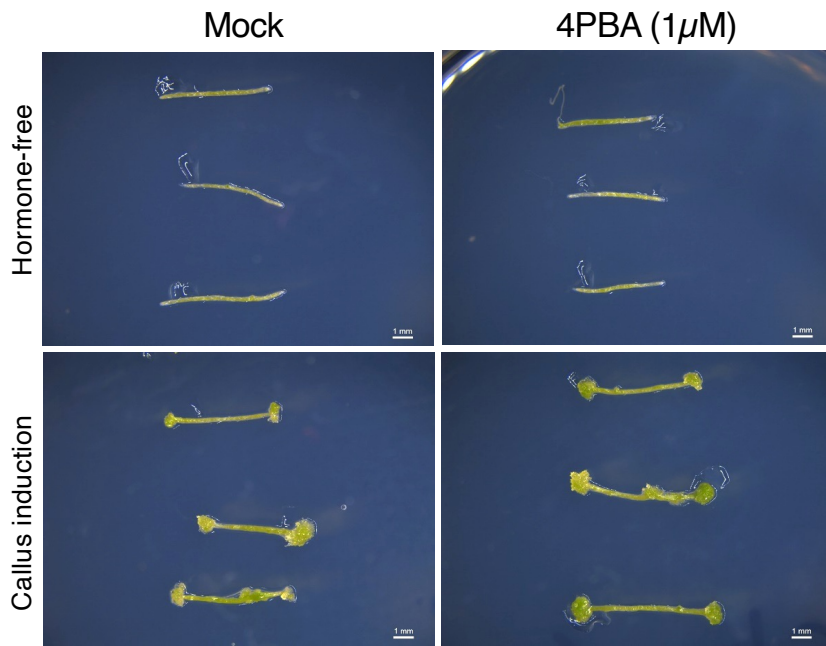

### Supplementary Figure S1

1  $\mu$ M 4-phenylbutyric acid (4PBA) does not have much of an effect on callus formation and regeneration compared to 20  $\mu$ M 4PBA (see Fig. 1A). Arabidopsis hypocotyl explants were cultured on 1  $\mu$ M 4PBA-containing medium for 28 days without (upper right panel) or with phytohormones (lower right panel; containing 5.4  $\mu$ M NAA and 4.4  $\mu$ M BA). In both cases, tissues on the 4PBA-containing medium were indistinguishable from mock (DMSO)-treated explants (left panels). Scale bar, 1 mm.
